# Supplementary material for: Achieving a Eu2+-doped NIR phosphor via ionic modulation and its multifunctional applications
Source: Royal Society of Chemistry journal article supplement (doi:10.1039/d4nj02446j), 2024-01-01
Supplement: d4nj02446j1.pdf [file d4nj02446j1.pdf]

### Supporting Information

**Table S1.** Parameters of  $\text{Ca}_{(1-x)}\text{Sr}_x\text{O}:\text{Eu}^{2+}$  ( $x = 0-0.2$ ).

| $x(\text{Sr}^{2+})$ | $U_{\text{iso}}$ | Cell parameters<br>( $\text{\AA}^3$ ) | Cell<br>Volume | $R_{\text{wp}}$ (%), $R_{\text{p}}$ (%),<br>$\chi^2$ |
|---------------------|------------------|---------------------------------------|----------------|------------------------------------------------------|
| 0                   | 0.0082           | a/b/c=4.792                           | 110.023        | 10.62, 7.82, 1.65                                    |
| 0.05                | 0.0092           | a/b/c=4.808                           | 111.17         | 9.52, 7.28, 1.42                                     |
| 0.1                 | 0.0103           | a/b/c=4.847                           | 113.839        | 9.17, 7.24, 1.35                                     |
| 0.15                | 0.0134           | a/b/c=4.857                           | 114.61         | 7.22, 5.58, 1.19                                     |
| 0.2                 | 0.0146           | a/b/c=4.871                           | 115.51         | 8.36, 6.32, 1.19                                     |

**Table S2.** Main parameters of  $\text{Eu}^{2+}$  activated NIR phosphors.

| Compounds                                             | $\lambda_{\text{ex}}$ (nm) | $\lambda_{\text{em}}$ (nm) | FWHM<br>(nm) | IQE<br>(%) | $I_{425\text{K}}$ (%) | Ref                  |
|-------------------------------------------------------|----------------------------|----------------------------|--------------|------------|-----------------------|----------------------|
| $\text{Ba}_3\text{Lu}(\text{BO}_3)_3$                 | 450                        | 720                        | 197          | /          | 22.5%                 | [8]                  |
| $\text{K}_3\text{LuSi}_2\text{O}_7$                   | 460                        | 740                        | 160          | 15%        | 59%                   | [21]                 |
| $\text{Ba}_{1.7}\text{Sr}_{0.3}\text{Ga}_4\text{O}_8$ | 450                        | 775                        | 230          | 20%        | 61%                   | [22]                 |
| $\text{SrBaSc}_{0.5}\text{Ga}_{1.5}\text{O}_5$        | 440                        | 728                        | 234          | /          | /                     | [24]                 |
| $\text{Sr}_{0.5}\text{Ba}_{0.5}\text{Y}_2\text{O}_4$  | 450                        | 773                        | 210          | 37%        | 90%                   | [25]                 |
| $\text{K}_3\text{ScSi}_2\text{O}_7$                   | 465                        | 735                        | 170          | /          | 70.4%                 | [26]                 |
| $\text{Ca}_3\text{Sc}_2\text{Si}_3\text{O}_{12}$      | 520                        | 840                        | 170          | /          | /                     | [28]                 |
| $\text{Ca}_{0.8}\text{Sr}_{0.2}\text{O}$              | 467                        | 783                        | 156          | 36.3       | 20.2%                 | <b>This<br/>work</b> |

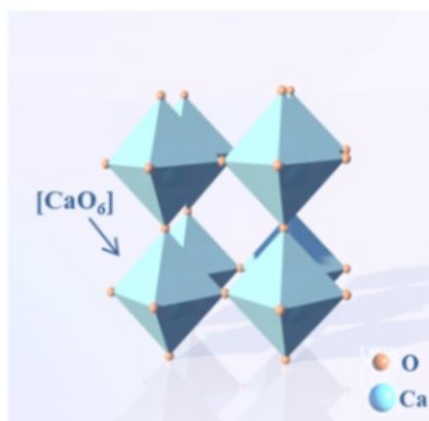

Figure S1. Crystal structure of CaO.

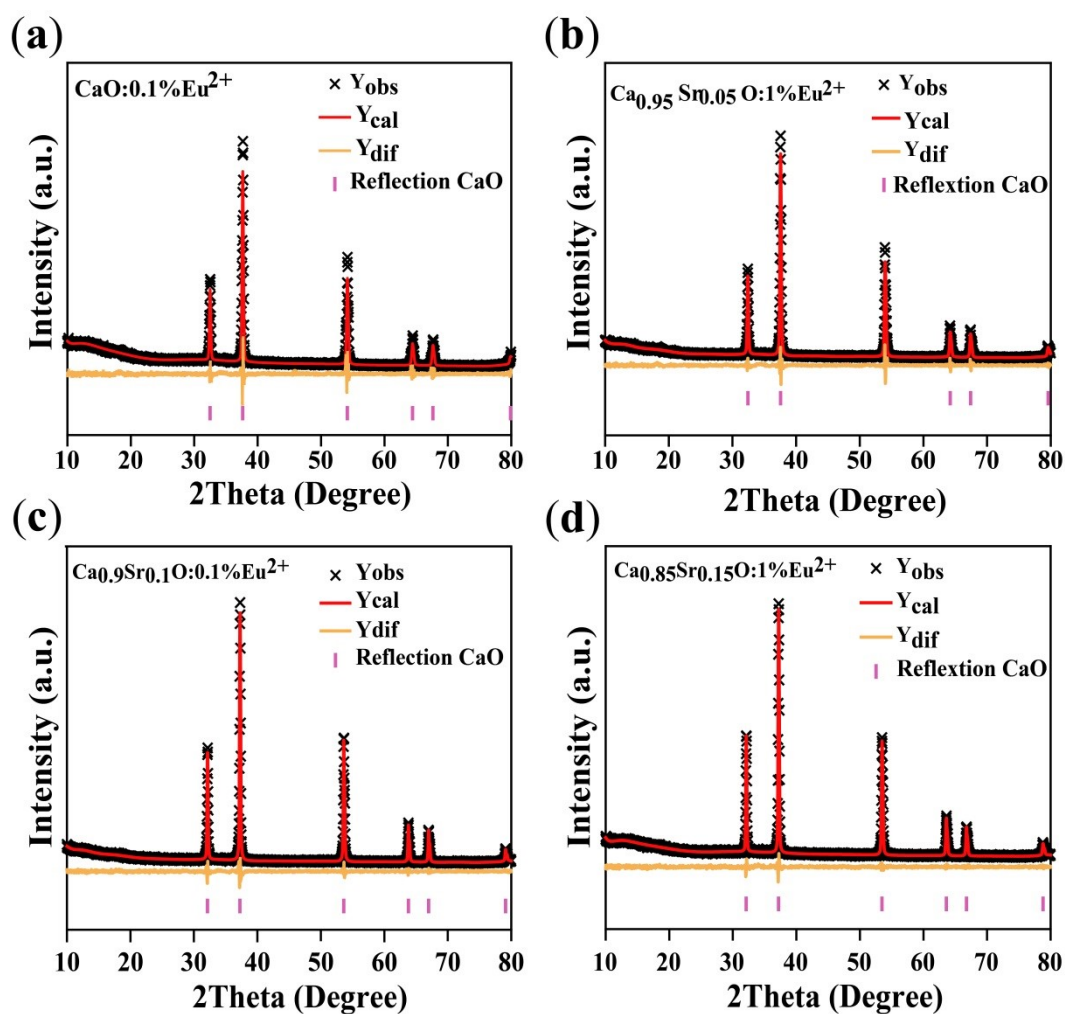

Figure S2. Difference Rietveld plot of  $\text{Ca}_{(1-x)}\text{Sr}_x\text{O:0.1\%Eu}^{2+}$ : (a)  $x = 0$ ; (b)  $x = 0.05$ ; (c)  $x = 0.1$ ; (d)  $x = 0.15$

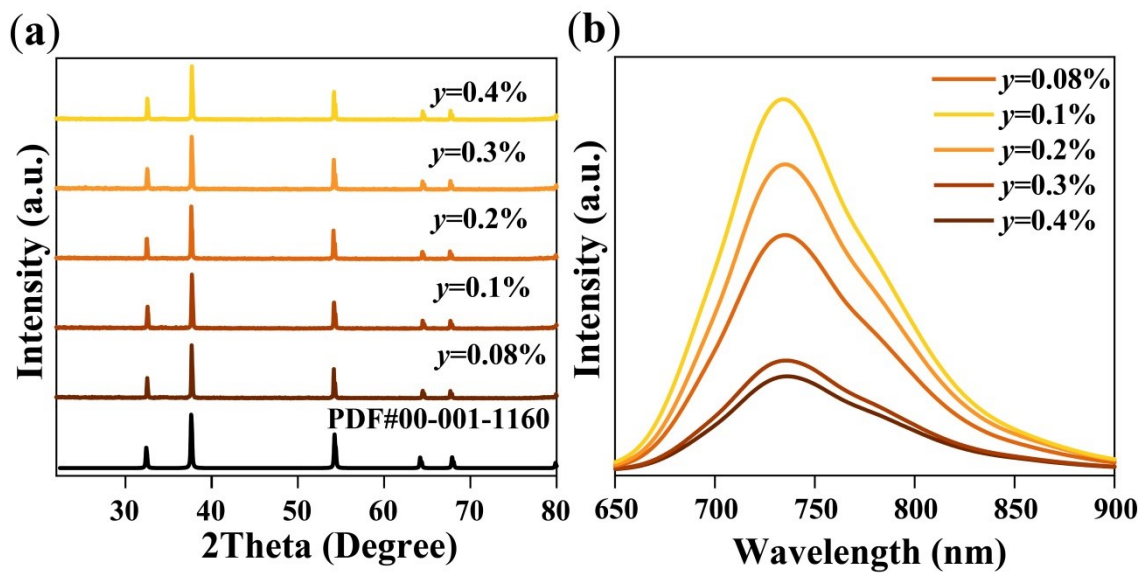

Figure S3.(a) XRD cards of  $\text{CaO}:\text{yEu}^{2+}$  ( $y = 0.08\%-0.4\%$ ). (b) PL spectra of  $\text{CaO}:\text{yEu}^{2+}$

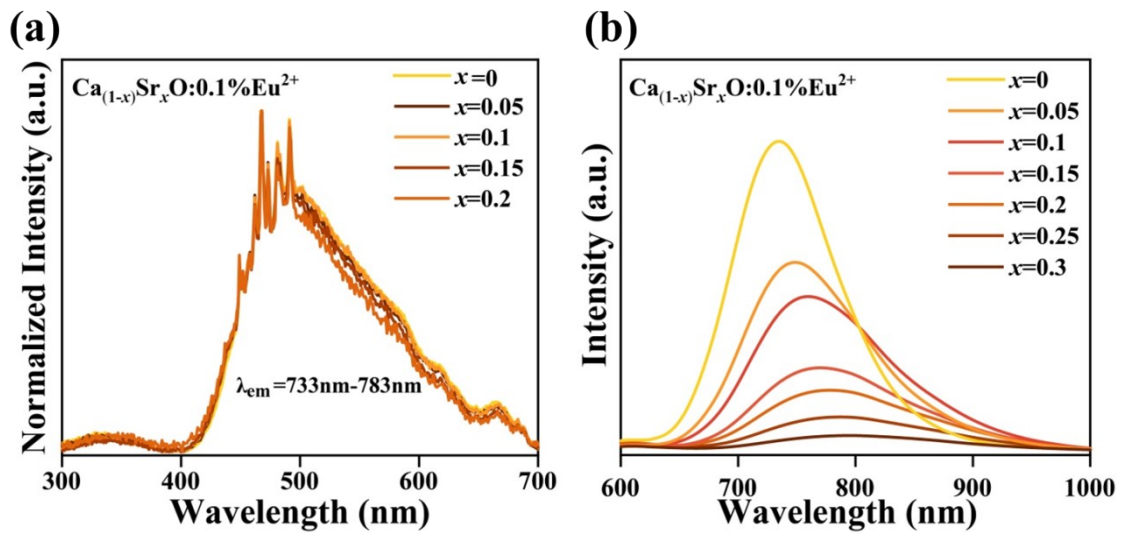

Figure S4. (a) Normalized PLE spectra of  $\text{Ca}_{(1-x)}\text{Sr}_x\text{O}:\text{0.1\%Eu}^{2+}$ . (b) PL spectra of  $\text{Ca}_{(1-x)}\text{Sr}_x\text{O}:\text{0.1\%Eu}^{2+}$ .

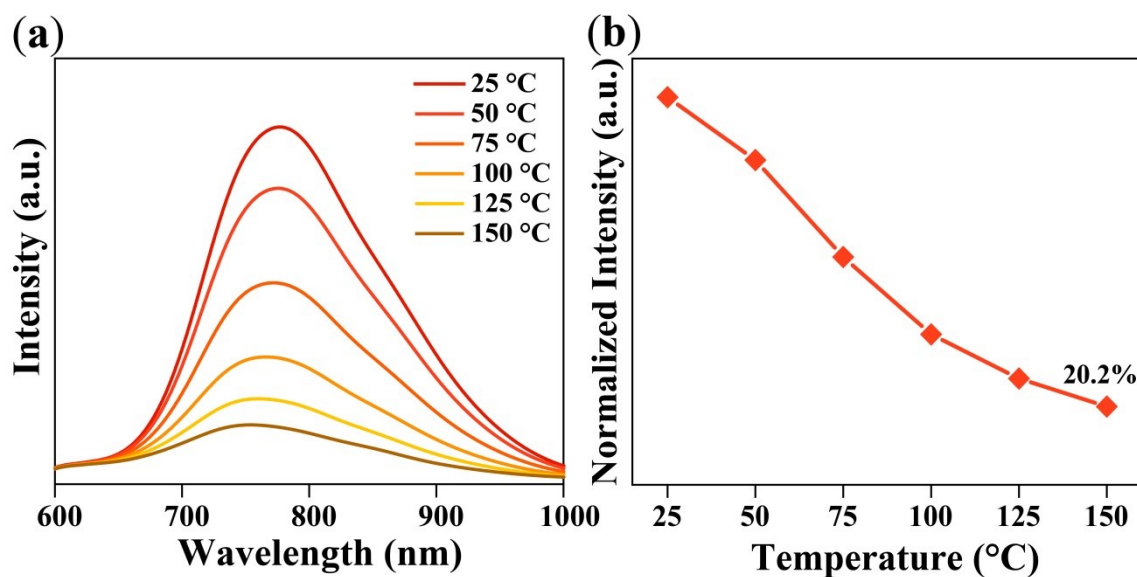

**Figure S5.** (a) Temperature-dependent PL spectra of  $\text{Ca}_{0.8}\text{Sr}_{0.2}\text{O}:\text{0.1\%Eu}^{2+}$ . (b) Temperature dependent normalized integrated PL intensities excited at 467nm.

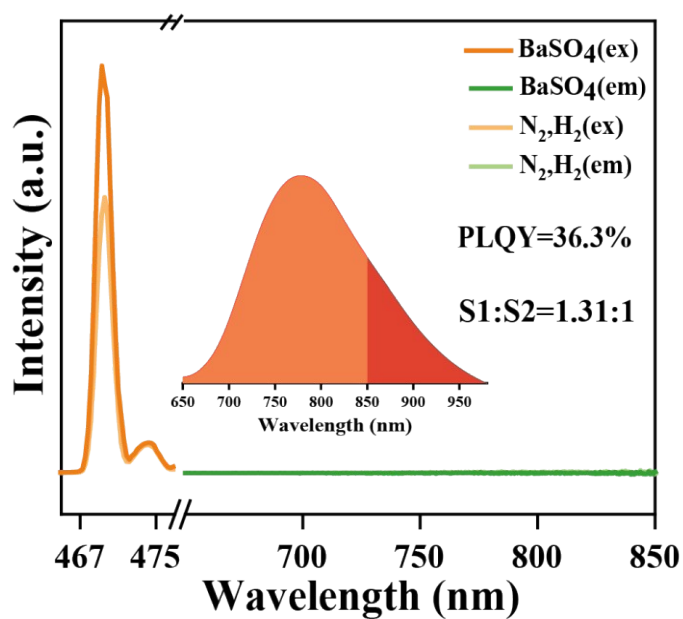

**Figure S6.** Integrated intensity of  $\text{Ca}_{0.8}\text{Sr}_{0.2}\text{O}:\text{Eu}^{2+}$  for IQY measurements (Insert: The total integral area is S1 and the integrated area before 850nm is S2).

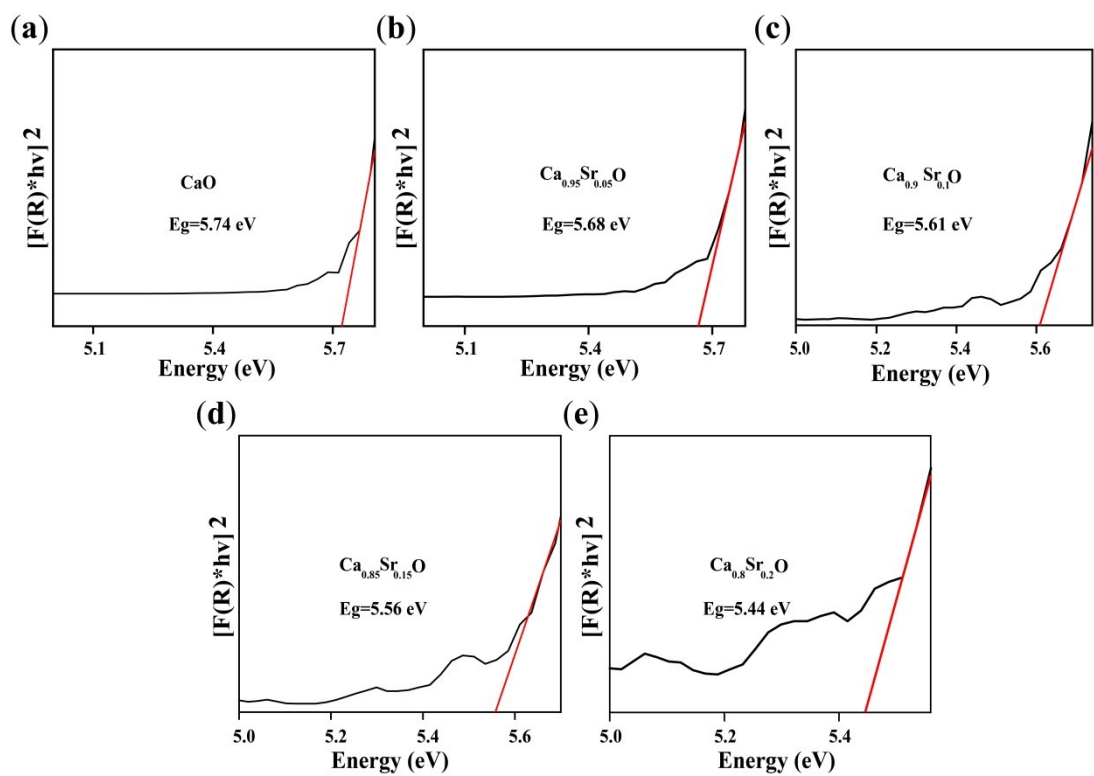

**Figure S7.** Band gap calculation for  $\text{Ca}_{(1-x)}\text{Sr}_x\text{O}$  ( $x = 0-0.2$ ). (a)  $x = 0$ ; (b)  $x = 0.05$ ; (c)  $x = 0.1$ ; (d)  $x = 0.15$ . (e)  $x = 0.2$ .
